# Supplementary material for: Retention During Freezing of Raindrops, Part II: Investigation of Ambient Organics from Beijing Urban Aerosol Samples
Source: Copernicus journal article supplement (doi:10.5194/egusphere-2024-3940), 2024-12-20
Supplement: Supplementary file 1 [file egusphere-2024-3940-supplement.pdf]

# Supplemental Information: Retention measurements of Complex WSOC from Beijing PM Samples through Acoustic Levitation

Jackson Seymore\*<sup>1,2</sup>, Martanda Gautam<sup>2</sup>, Miklós Szakáll<sup>2</sup>, Alexander Theis<sup>2</sup>, Jialiang Ma<sup>3</sup>, Alexander L. Vogel<sup>3</sup>, Lingli Zhou<sup>4</sup>

<sup>1</sup> Max Planck Graduate Center, Max Planck Institute for Chemistry, Mainz, Germany

<sup>2</sup> Institute for Atmospheric Physics, Johannes Gutenberg University, Mainz, Germany

<sup>3</sup> Institute for Atmospheric and Environmental Sciences, Goethe-University Frankfurt, Germany

<sup>4</sup> South China Institute of Environmental Sciences, Ministry of Ecology and Environment, Guangzhou, P.R. China

\*Corresponding author: [seymorej@uni-mainz.de](mailto:seymorej@uni-mainz.de)

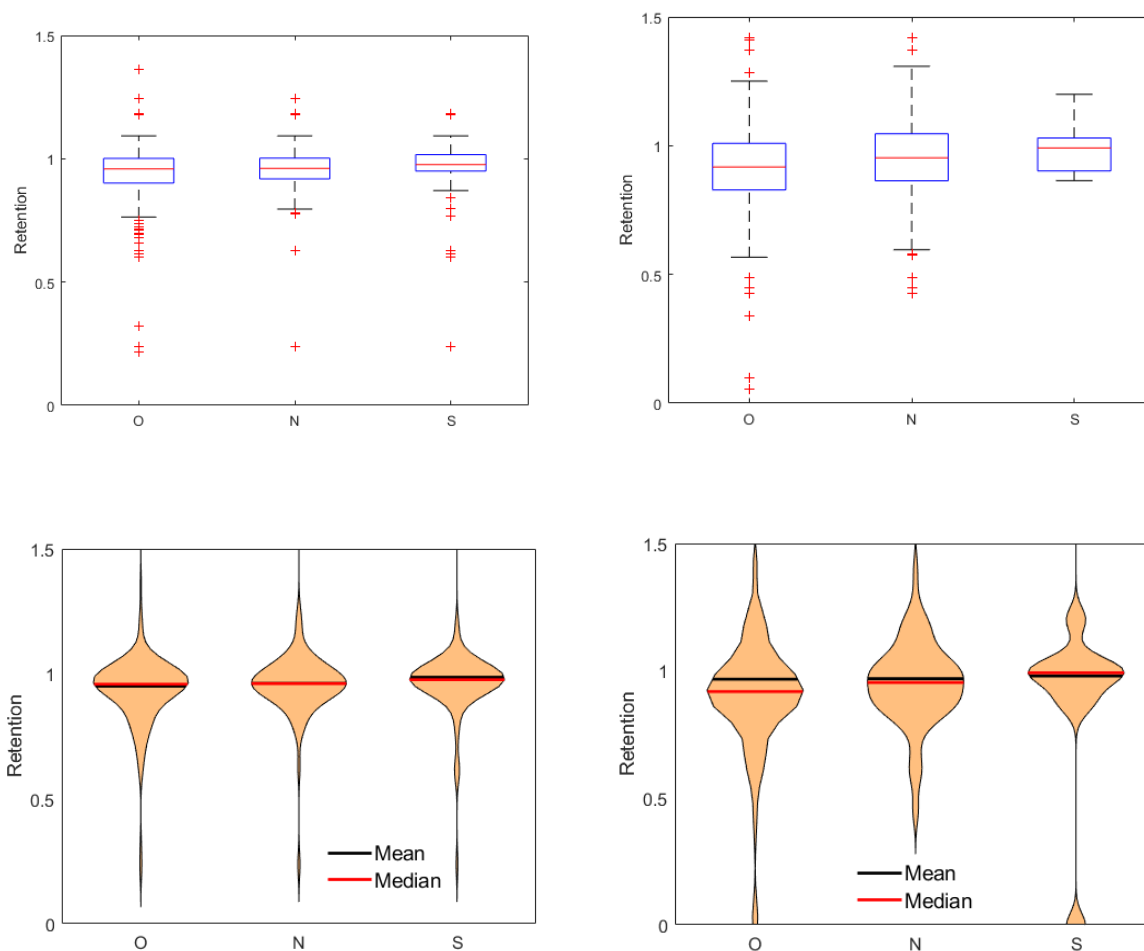

Figure S1. Boxplots and Violin plots of the Retention Coefficients of species observed grouped by heteroatom; Left (-)HESI, Right (+)HESI

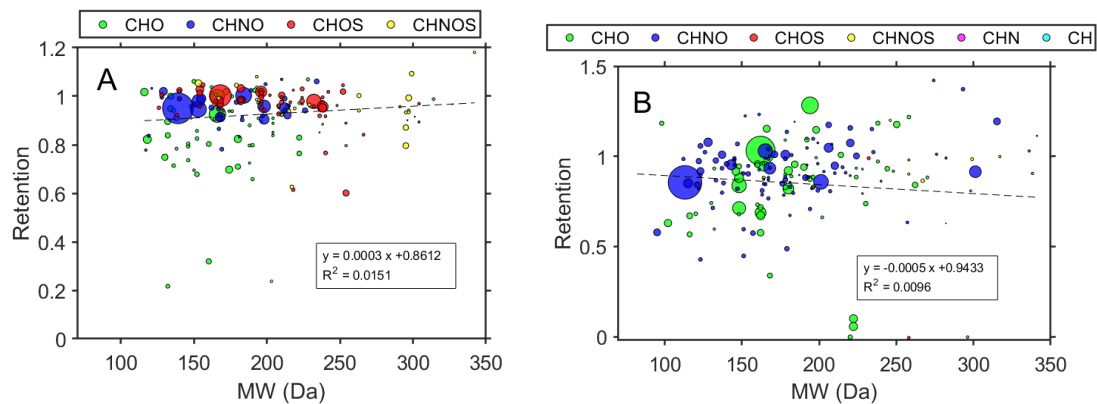

Figure S2. Retention Coefficient as a function of Molecular Weight (MW); (A) (-)HESI, (B) (+)HESI; Color denotes compositional class of the assigned compound as used in Fig. 1: Green for CHO, blue for CHNO, red for CHOS, yellow for CHNOS, magenta for CHN, cyan for CH. Dashed line shows linear fit.
